# Supplementary material
Source: PubMed Central journal article supplement (PMC4805660)
Supplement: thnov06p0650s1.pdf [file thnov06p0650s1.pdf]

# Multimodal Somatostatin Receptor Theranostics Using [<sup>64</sup>Cu]Cu- /[<sup>177</sup>Lu]Lu-DOTA-(Tyr<sup>3</sup>)octreotate and AN-238 in a Mouse Pheochromocytoma Model

Supplemental data

Martin Ullrich<sup>1</sup>, Ralf Bergmann<sup>1</sup>, Mirko Peitzsch<sup>2</sup>, Erik F. Zenker<sup>1</sup>, Marc Cartellieri<sup>3</sup>, Michael Bachmann<sup>1,3</sup>, Monika Ehrhart-Bornstein<sup>4</sup>, Norman L. Block<sup>5</sup>, Andrew V. Schally<sup>5</sup>, Graeme Eisenhofer<sup>2,4</sup>, Stefan R. Bornstein<sup>4</sup>, Jens Pietzsch<sup>1,6</sup>, and Christian G. Ziegler<sup>7,8</sup>

<sup>1</sup> Dept. of Radiopharmaceutical and Chemical Biology, Institute of Radiopharmaceutical Cancer Research, Helmholtz-Zentrum Dresden-Rossendorf, Dresden, Germany

<sup>2</sup> Institute for Clinical Chemistry and Laboratory Medicine, Technische Universität Dresden, Dresden, Germany

<sup>3</sup> University Cancer Center, Tumorimmunology, Technische Universität Dresden, Dresden, Germany

<sup>4</sup> Dept. of Medicine III, University Hospital Carl Gustav Carus, Dresden, Germany

<sup>5</sup> VA Medical Center Miami FL and Dept. of Pathology and Medicine, Div. of Endocrinology and Hematology-Oncology and Sylvester Comprehensive Cancer Center, University of Miami Miller School of Medicine, Miami FL, USA

<sup>6</sup> Dept. of Chemistry and Food Chemistry, Technische Universität Dresden, Dresden, Germany

<sup>7</sup> Paul Langerhans Institute Dresden of the Helmholtz Center Munich at the University Hospital and faculty of Medicine, Technische Universität Dresden, Dresden, Germany

<sup>8</sup> German Center for Diabetes Research e.V., Neuherberg, Germany

**Table S3:** [<sup>64</sup>Cu]Cu-DOTATATE uptake values in MPC-mCherry tumor-bearing mice as determined in PLI, PET, and ex vivo radiotracer distribution studies; radiotracer uptake was blocked by co-injection of various therapeutic somatostatin analogs at 0.2 μmol/kg; (T) tumor; (% inh.) relative inhibition compared to control; (M) muscle; (H) heart; (B) blood; (L) liver; (K) kidneys; (P) pancreas; data are presented as means ± SEM; significance of differences was tested as compared to control; \*  $p < 0.05$ ; †  $p < 0.01$ ; ‡  $p < 0.001$ .

|                                                   |            | control        | octreotide         | [ <sup>nat</sup> Lu]Lu-DOTATATE | AN-238             |
|---------------------------------------------------|------------|----------------|--------------------|---------------------------------|--------------------|
| <i>Photostimulated luminescence imaging (PLI)</i> |            |                |                    |                                 |                    |
| max UV <sub>PLI</sub> × 10 <sup>5</sup>           | T (% inh.) | 19.3 ± 2.3 (0) | 9.1 ± 0.6 (52.9)†  | 4.9 ± 0.7 (74.7)‡               | 13.5 ± 1.5 (30.0)* |
|                                                   | M (% inh.) | 0.70 ± 0.1 (0) | 0.66 ± 0.1 (6.6)   | 0.64 ± 0.1 (8.5)                | 0.71 ± 0.1 (-1.4)  |
|                                                   | T/M        | 25.3 ± 2.6     | 13.8 ± 30.3†       | 7.6 ± 31.0‡                     | 19.4 ± 31.4*       |
| <i>Positron emission tomography (PET)</i>         |            |                |                    |                                 |                    |
| max SUV <sub>PET</sub>                            | T (% inh.) | 8.2 ± 0.2 (0)  | 4.1 ± 0.1 (49.3) ‡ | 1.1 ± 0.1 (86.2)‡               | 6.6 ± 0.7 (19.3)*  |
|                                                   | M (% inh.) | 0.1 ± 0.01 (0) | 0.1 ± 0.01 (-29.5) | 0.1 ± 0.01 (-27.6)              | 0.1 ± 0.02 (-11.7) |
|                                                   | H (% inh.) | 0.3 ± 0.05 (0) | 0.2 ± 0.03 (28.3)  | 0.4 ± 0.1 (-37.6)               | 0.3 ± 0.1 (-14.9)  |
|                                                   | L (% inh.) | 1.1 ± 0.2 (0)  | 0.9 ± 0.1 (11.5)   | 1.1 ± 0.1 (-5.3)                | 0.8 ± 0.04 (20.7)  |
|                                                   | K (% inh.) | 1.4 ± 0.4 (0)  | 1.7 ± 0.4 (-20.3)  | 1.2 ± 0.1 (14.3)                | 1.7 ± 0.2 (-19.1)  |
|                                                   | T/M        | 78.9 ± 4.7     | 31.5 ± 4.4‡        | 8.5 ± 0.7‡                      | 58.3 ± 6.0*        |
| <i>Ex vivo radiotracer distribution (RD)</i>      |            |                |                    |                                 |                    |
| SUV <sub>RD</sub>                                 | T (% inh.) | 10.9 ± 0.3 (0) | 5.2 ± 0.3 (51.8)‡  | 1.7 ± 0.2 (84.9)‡               | 7.6 ± 1.1 (30.0)‡  |
|                                                   | M (% inh.) | 0.1 ± 0.01 (0) | 0.2 ± 0.2 (-232)   | 0.3 ± 0.2 (-250)                | 0.1 ± 0.03 (-40.9) |
|                                                   | B (% inh.) | 0.1 ± 0.01 (0) | 0.1 ± 0.01 (10.4)  | 0.1 ± 0.02 (-0.3)               | 0.1 ± 0.01 (3.2)   |
|                                                   | L (% inh.) | 1.7 ± 0.3 (0)  | 1.5 ± 0.1 (12.5)   | 1.9 ± 0.2 (-7.7)                | 1.4 ± 0.1 (20.9)   |
|                                                   | K (% inh.) | 1.2 ± 0.1 (0)  | 1.2 ± 0.1 (-4.2)   | 1.5 ± 0.4 (-28.8)               | 1.9 ± 0.5 (-57.1)  |
|                                                   | P (% inh.) | 1.8 ± 0.4 (0)  | 0.9 ± 0.1 (50.8)*  | 0.8 ± 0.4 (55.5)*               | 1.7 ± 0.3 (5.8)    |
|                                                   | T/M        | 79.7 ± 48.9    | 91.0 ± 13.1        | 14.4 ± 5.3                      | 89.2 ± 26.3        |
|                                                   | T/B        | 118 ± 8.8      | 61.5 ± 4.1‡        | 18.6 ± 2.0‡                     | 84.1 ± 4.9†        |

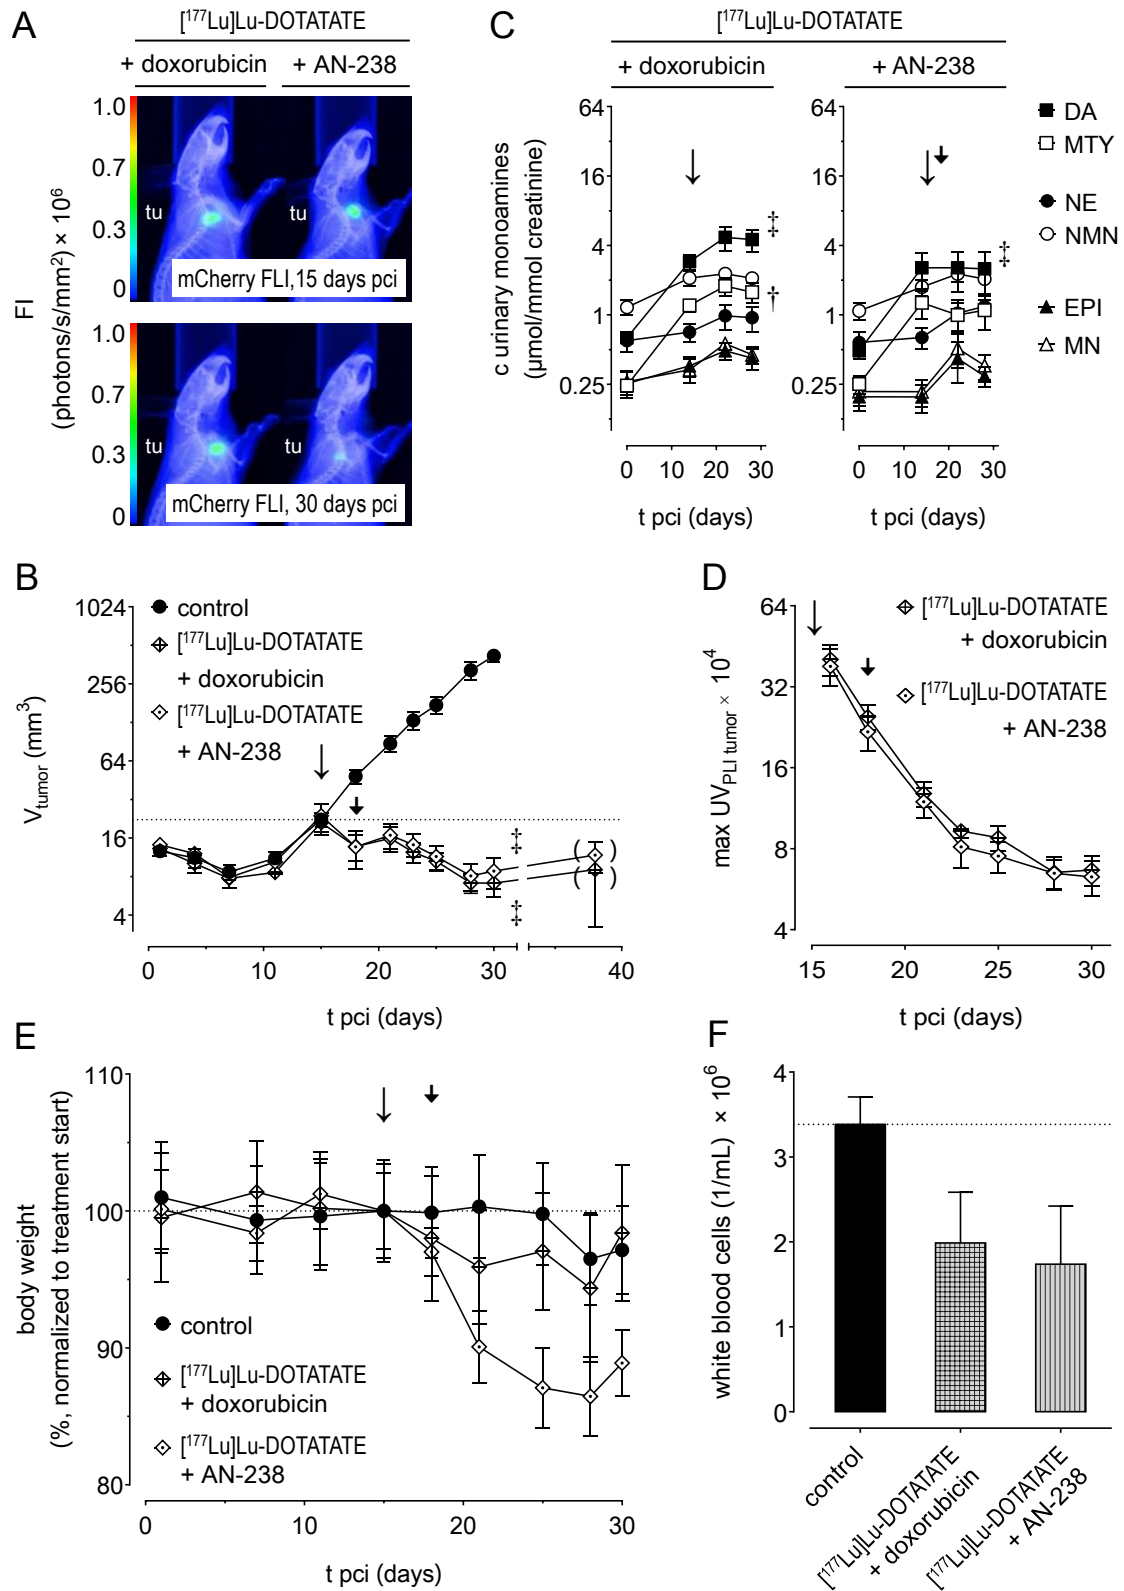

**Figure S8:** Effects of combined  $[^{177}\text{Lu}]\text{Lu-DOTATATE}$  (80 MBq/animal) treatment with doxorubicin (6.9 μmol/kg) or AN-238 (0.2 μmol/kg) in MPC-mCherry tumor-bearing mice; (A) FLI/X-ray overlays after 15 and 30 days pci; (B) monitoring of tumor volume; data points in parentheses: extended follow-up of 3 randomly selected animals; significance of differences as compared to control after 30 days pci; (C) monitoring of renal monoamine excretion; significance of differences as compared to 0 days pci; (C) decay-corrected  $^{177}\text{Lu}$  activity in tumors; (E) monitoring of body weight; (F) white blood cell count after 30 days pci; (↓) application of  $[^{177}\text{Lu}]\text{Lu-DOTATATE}$  and doxorubicin; (†) application of AN-238; (DA) dopamine; (NE) norepinephrine; (MTY) 3-methoxytyramine; (NMN) normetanephrine; (EPI) epinephrine; (MN) metanephrine; data are presented as means ± SEM; †  $p < 0.01$ ; ‡  $p < 0.001$ .

**Table S4:** Curve fitting parameters describing MPC-mCherry tumor progression and tumor accumulation of  $^{177}\text{Lu}$  activity in mice undergoing doxorubicin (6.9  $\mu\text{mol/kg}$ ), AN-238 (0.2  $\mu\text{mol/kg}$ ), and [ $^{177}\text{Lu}$ ]Lu-DOTATATE (80 MBq/animal) treatment; (EG) exponential growth (ED) exponential decay; data are presented as means  $\pm$  SEM; significance of differences was tested as compared to control: \*  $p < 0.05$ , as compared to doxorubicin: #  $p < 0.05$ .

|                                                                                                                  | control       | doxorubicin     | AN-238           | [ $^{177}\text{Lu}$ ]Lu-DOTATATE |               |               |
|------------------------------------------------------------------------------------------------------------------|---------------|-----------------|------------------|----------------------------------|---------------|---------------|
|                                                                                                                  |               |                 |                  | + doxorubicin                    | + AN-238      |               |
| <i>Progression of tumor growth (<math>V_{\text{tumor}}</math>)</i>                                               |               |                 |                  |                                  |               |               |
| $x$ -range (days pci)                                                                                            | 7-30          | 21-30           | 21-30            | 15-30                            | 21-30         | 21-30         |
| fitting algorithm                                                                                                | EG            | EG              | EG               | ED                               | ED            | ED            |
| $R^2$                                                                                                            | 0.996         | 0.997           | 0.999            | 0.935                            | 0.892         | 0.828         |
| $t_D$ (days)                                                                                                     | $4.0 \pm 0.2$ | $3.4 \pm 0.1^*$ | $4.1 \pm 0.1^\#$ | -                                | -             | -             |
| $t_{1/2}$ (days)                                                                                                 | -             | -               | -                | $2.8 \pm 1.1$                    | $4.0 \pm 1.5$ | $3.9 \pm 2.4$ |
| <i>Decay-corrected <math>^{177}\text{Lu}</math> activity in tumors (<math>\max UV_{\text{PLI tumor}}</math>)</i> |               |                 |                  |                                  |               |               |
| $x$ -range (days pci)                                                                                            | -             | -               | -                | 16-30                            | 21-30         | 21-30         |
| fitting algorithm                                                                                                | -             | -               | -                | ED                               | ED            | ED            |
| $R^2$                                                                                                            | -             | -               | -                | 0.998                            | 0.892         | 0.828         |
| $t_{1/2}$ (days)                                                                                                 | -             | -               | -                | $2.3 \pm 0.2$                    | $2.2 \pm 0.3$ | $2.0 \pm 0.2$ |

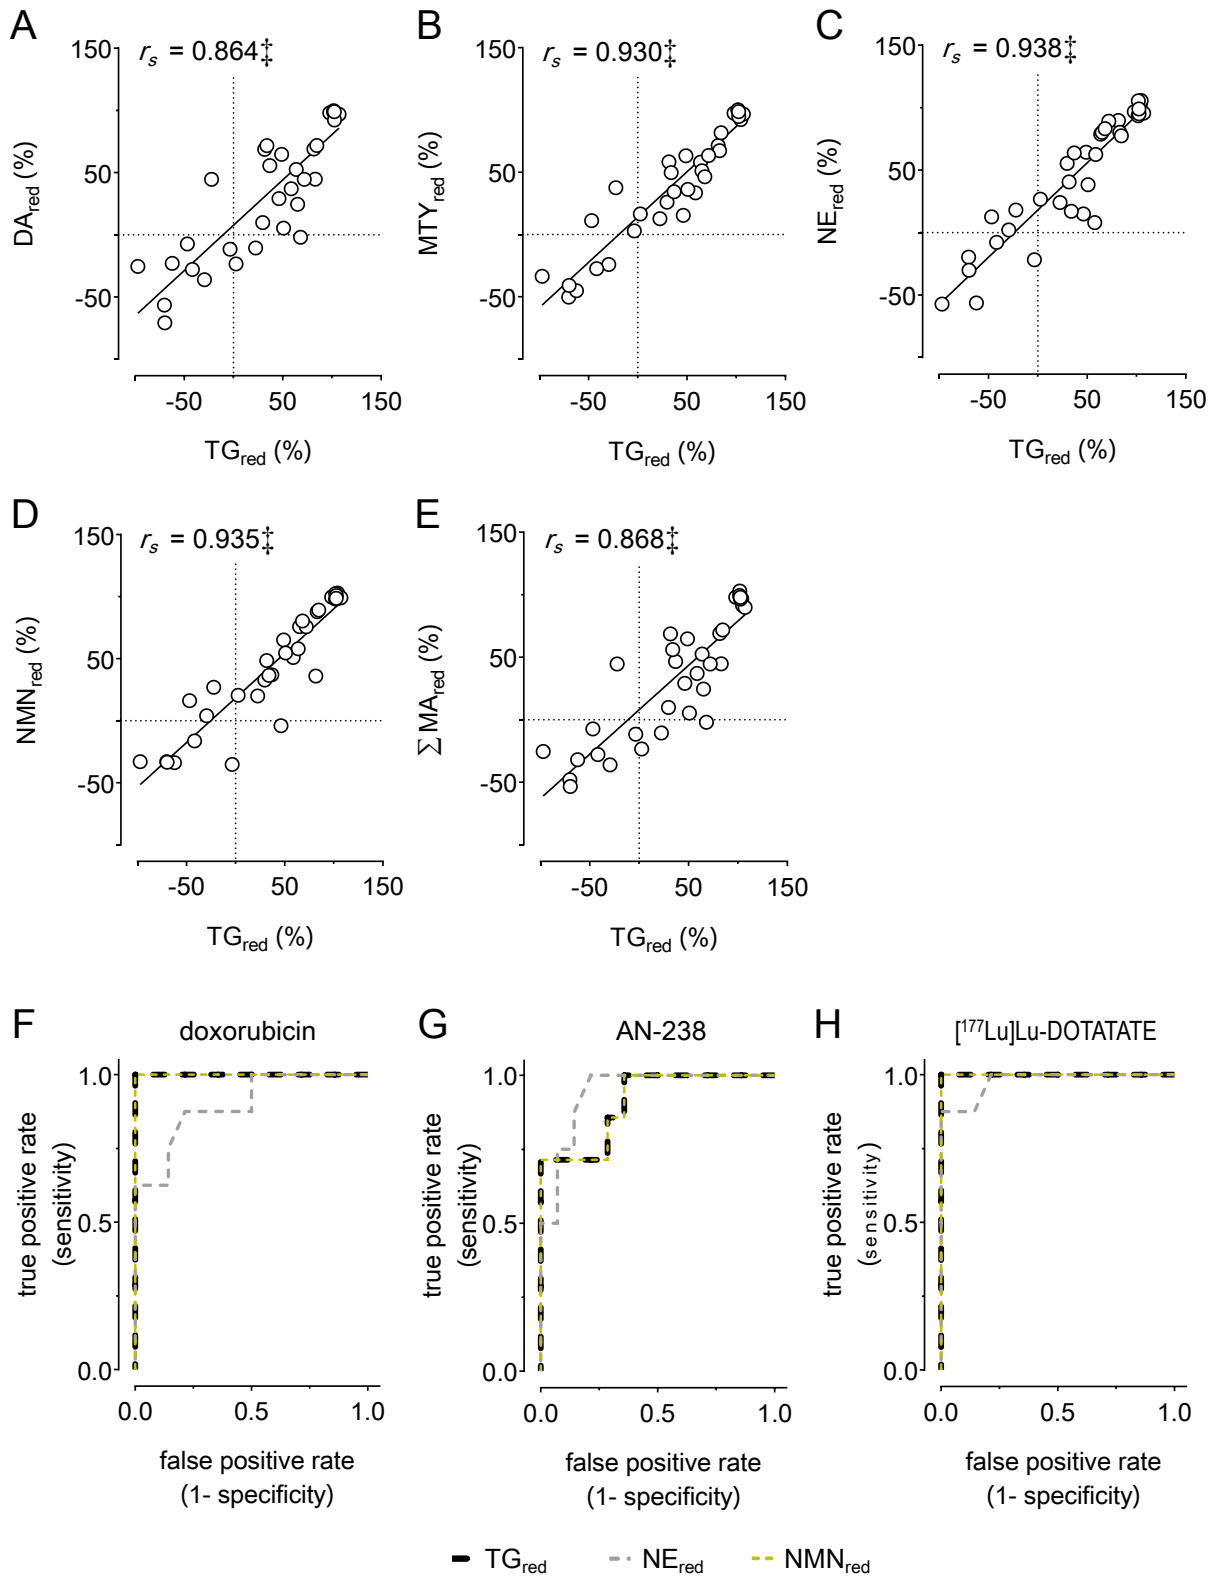

**Figure S9:** Efficiency of endpoint parameters to evaluate therapeutic outcome in MPC-mCherry-bearing mice after doxorubicin (6.9  $\mu\text{mol/kg}$ ), AN-238 (0.2  $\mu\text{mol/kg}$ ), and [<sup>177</sup>Lu]Lu-DOTATATE (80 MBq/animal) treatment; (A-E) correlation between the reduction of tumor growth and renal monoamine excretion; (red) reduction compared to control; (TG) tumor growth; (DA) dopamine; (MTY) 3-methoxytyramine; (NE) norepinephrine; (NMN) normetanephrine; ( $\Sigma$ MA) overall monoamines DA + MTY + NE + NMN; ( $r_s$ ) Spearman's linear correlation coefficient,  $\ddagger p < 0.001$ ; (F-H) ROC curve analysis; areas under curves represent the probability that an animal in a therapy group will have a higher test result of the parameter than a control animal.

**Table S5:** Probability of endpoint parameters to detect treatment response of MPC-mCherry tumor-bearing mice as determined by ROC curve analysis; (red) reduction compared to control; (TG) tumor growth; (DA) dopamine; (MTY) 3-methoxytyramine; (NE) norepinephrine; (NMN) normetanephrine; ( $\Sigma$ MA) overall monoamines DA + MTY + NE + NMN; data are presented as area under curve (AUC) with [95% confidence interval]; AUC represents the probability that an animal in a therapy group will have a higher test result of the endpoint parameter than a control animal; \*  $p < 0.05$ , †  $p < 0.01$ , ‡  $p < 0.001$ ;  $p$  indicates whether an endpoint parameter significantly discriminates animals in therapy groups from controls.

| therapeutic endpoint parameter | doxorubicin       | AN-238            | [ <sup>177</sup> Lu]Lu-DOTATATE |
|--------------------------------|-------------------|-------------------|---------------------------------|
| TG <sub>red</sub>              | 1 [1-1]‡          | 0.91 [0.77-1.04]† | 1 [1-1]‡                        |
| DA <sub>red</sub>              | 0.64 [0.37-0.91]  | 0.76 [0.54-0.97]  | 1 [1-1]‡                        |
| MTY <sub>red</sub>             | 0.80 [0.54-1.06]* | 0.87 [0.71-1.02]† | 1 [1-1]‡                        |
| NE <sub>red</sub>              | 0.90 [0.76-1.04]† | 0.94 [0.85-1.03]‡ | 0.98 [0.92-1.03]‡               |
| NMN <sub>red</sub>             | 1 [1-1]‡          | 0.91 [0.77-1.04]† | 1 [1-1]‡                        |
| $\Sigma$ MA <sub>red</sub>     | 0.64 [0.37-0.919] | 0.80 [0.60-0.99]* | 1 [1-1]‡                        |
